# Supplementary material
Source: PubMed Central journal article supplement (PMC9734637)
Supplement: 239_2022_10079_MOESM3_ESM.pdf [file 239_2022_10079_MOESM3_ESM.pdf]

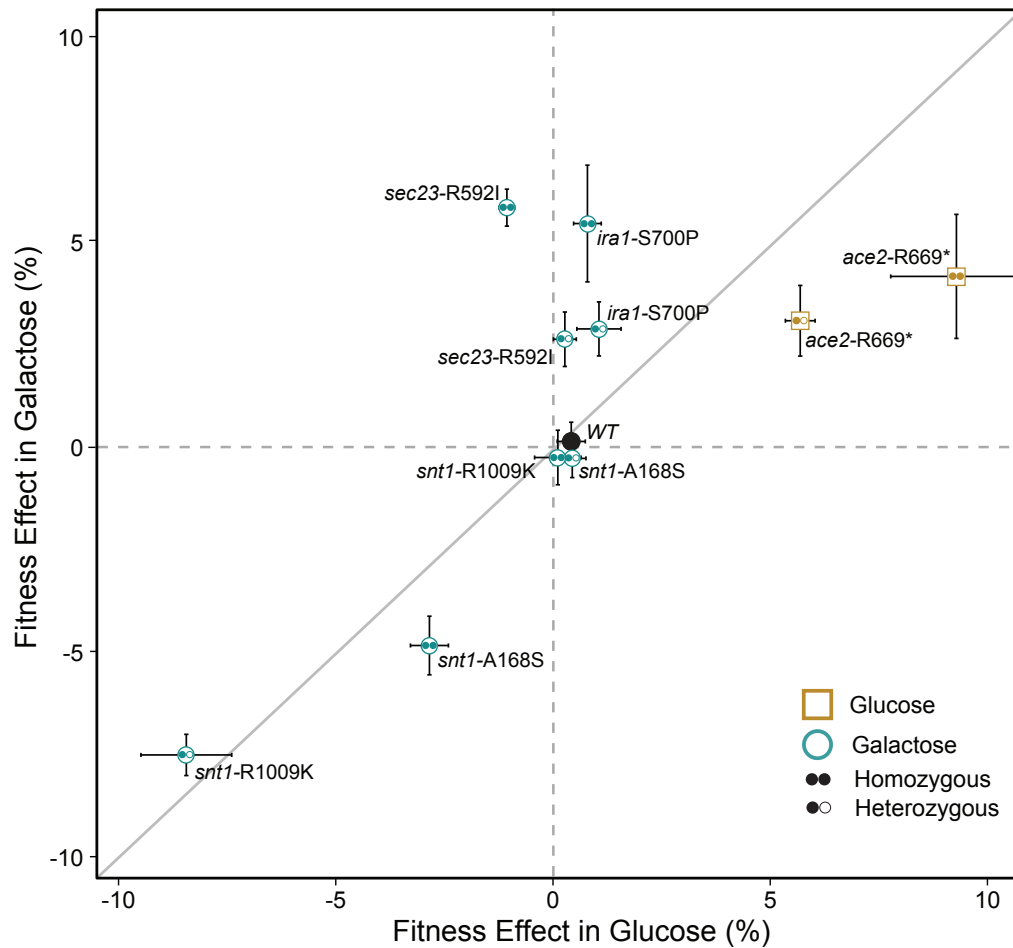

**Supplementary Figure 2. Fitness of evolved mutations correlate with the condition in which the specific mutation arose.** Plotted is the correlation of the average fitness effects of the reconstructed mutations *snt1* (n=6), *sec23* (n=6), *ira1* (n=4), and *ace2* (n=4) in heterozygous diploid and homozygous diploids in galactose and glucose condition. Mutations that arose in galactose evolution are indicated by cyan circles and mutation that arose in glucose evolution, *ace2*, is indicated by gold square. Pearson correlation coefficient  $r = 0.69$ ,  $p = 0.0122$ . Error bars represent s.e.m.
