# Supplementary material
Source: PubMed Central journal article supplement (PMC9734637)
Supplement: 239_2022_10079_MOESM4_ESM.pdf [file 239_2022_10079_MOESM4_ESM.pdf]

A

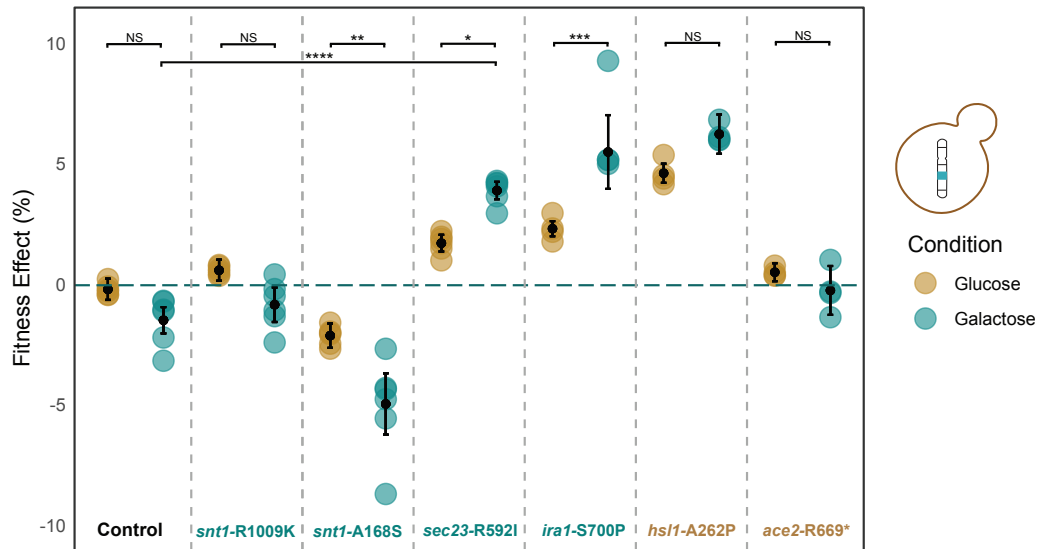

B

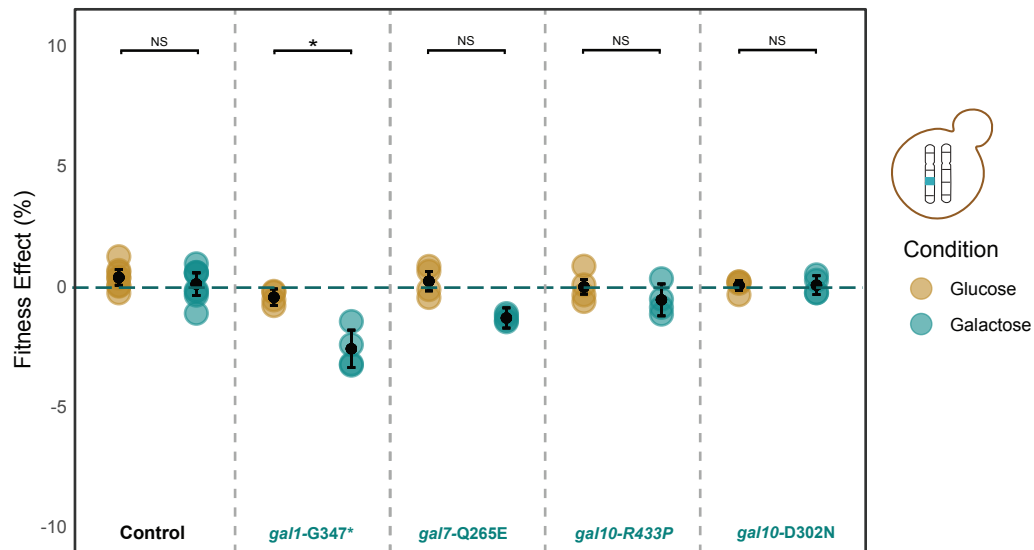

**Supplementary Figure 3.** Fitness effect of Galactose-evolved alleles. (A) Average fitness effects of the reconstructed mutations in *snt1* (n=6), *sec23* (n=6), and *ira1* (n=4), *hsl1* (n=4), and *ace2* (n=4) in haploid background. The *sec23* allele has a significant fitness gain in galactose compare to glucose. Asterisk (\*\*\*\*) indicates  $p < 10^{-8}$ , (\*\*\*)  $p < 10^{-4}$ , (\*\*)  $p < 10^{-3}$ , (\*)  $p < 10^{-2}$ , and NS: not significant; one-way ANOVA, tukey's HSD test. The *ira1* allele follows the same effect as *sec23* allele. (B) Average fitness effect of evolved mutations in *gal1* (n=4), *gal7* (n=4), *gal10* (n=4) in heterozygous allele. No fitness advantage from mutations in galactose genes. Error bars are the s.e.m.
