# Supplementary material
Source: PubMed Central journal article supplement (PMC9734637)
Supplement: 239_2022_10079_MOESM5_ESM.pdf [file 239_2022_10079_MOESM5_ESM.pdf]

**A**

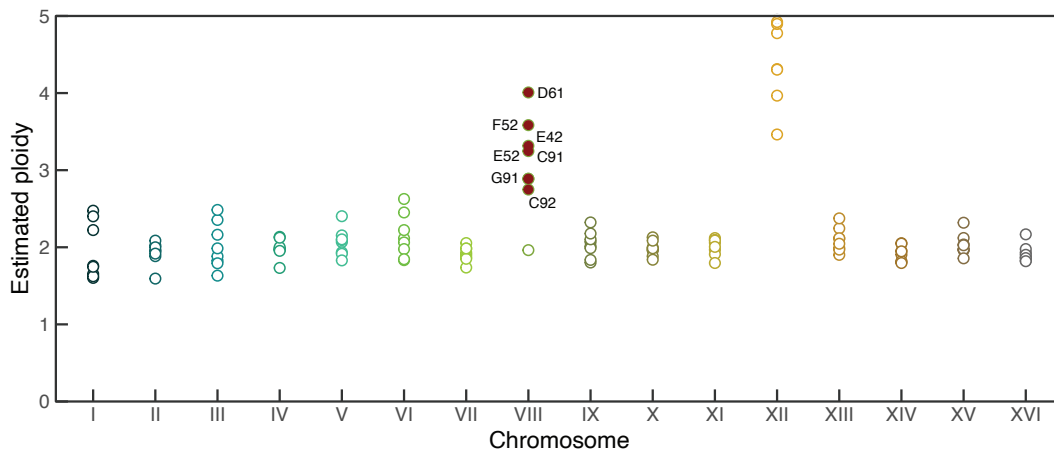

**B**

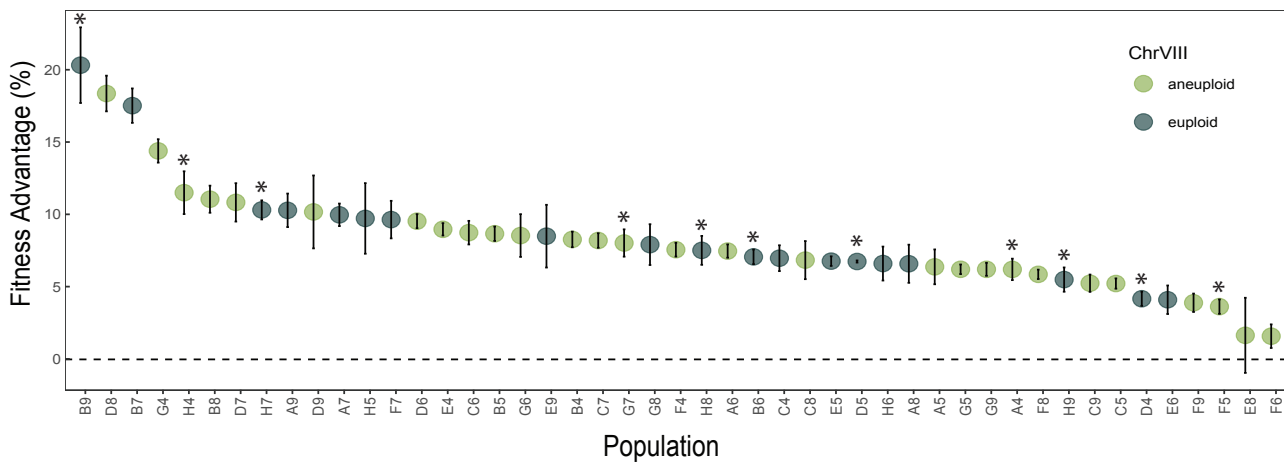

**Supplementary Figure 4. Aneuploidy on Chromosome VIII does not show correlation with populations fitness gain.** (A) Ploidy estimation of 8 independent clones from Nanopore sequencing. A large peak of coverage is observed on chromosome XII, which represents the tandemly repeated regions of the rDNA loci. Aneuploidies are shown as filled red circles and labeled by name population. Empty circles indicate euploidy. (B) Fitness effect of 48 populations after 2,000 generations. Populations with 3N or 4N copies on Chromosome VIII are represented in light green circles. Dark green circles indicate euploidy for Chromosome VIII. Populations with aneuploidy for Chromosome VIII did not show significant fitness advantage ( $p$ -value = 0.56, Wilcoxon Rank-Sum test). Asterisk marks populations with CNVs. We did not observe a correlation between CNVs and fitness advantage ( $p$ -value = 0.89, Wilcoxon Rank-Sum test)
