# Supplementary material
Source: PubMed Central journal article supplement (PMC9734637)
Supplement: 239_2022_10079_MOESM6_ESM.pdf [file 239_2022_10079_MOESM6_ESM.pdf]

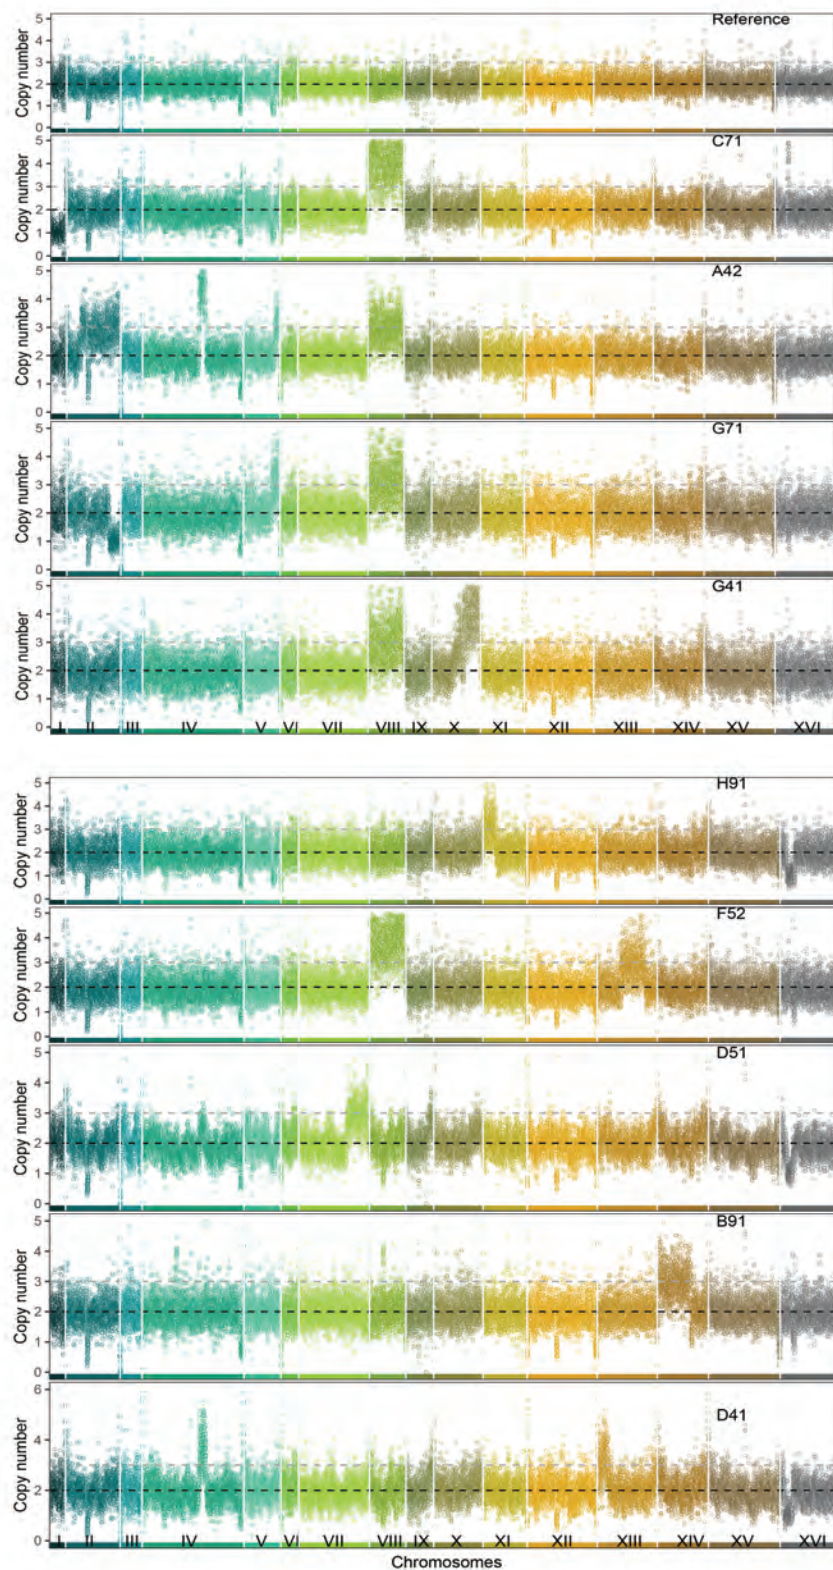

**Supplementary Figure 5. Detection of Structural Variants of nine evolved clones.** Coverage across each position on the genome using a sliding window approach; window size of 1000 bp and window step of 500 bp. Each color represents different Chromosomes. The baseline ploidy was assumed to be 2N.
