# Supplementary material
Source: PubMed Central journal article supplement (PMC9734637)
Supplement: 239_2022_10079_MOESM8_ESM.pdf [file 239_2022_10079_MOESM8_ESM.pdf]

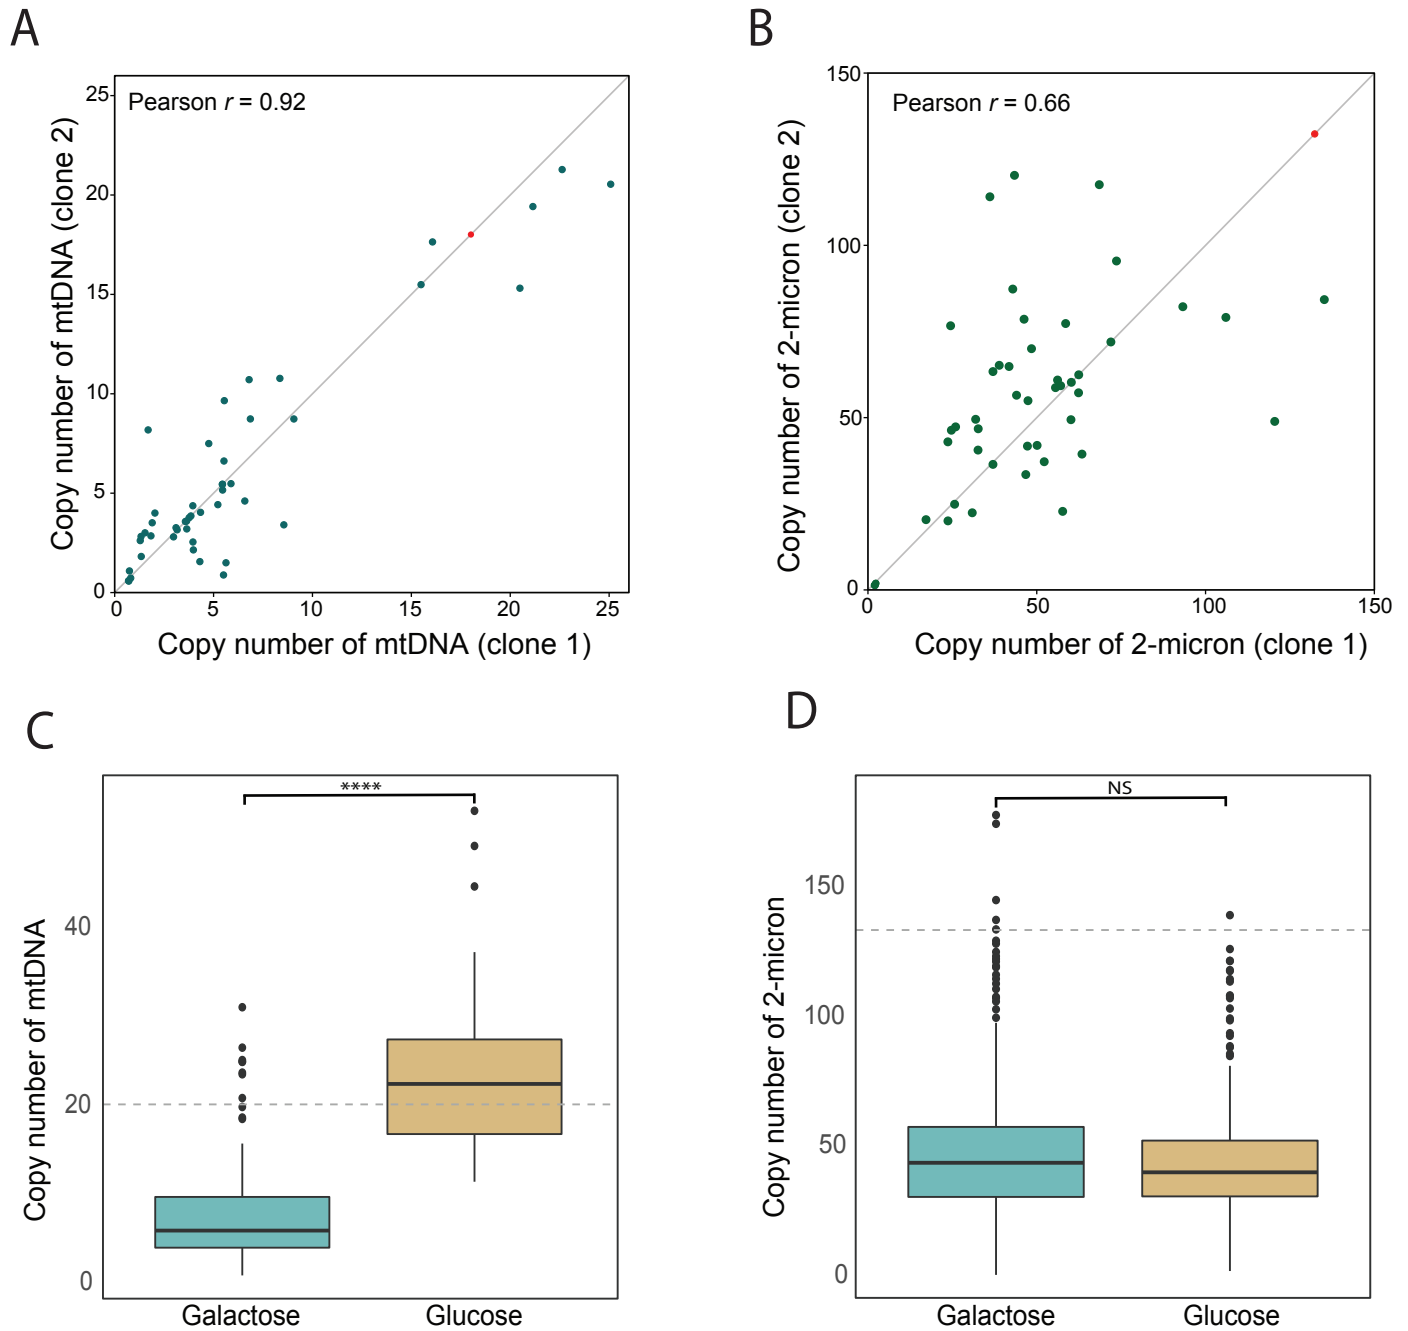

**Supplementary Figure 7. Copy number estimation of extrachromosomal elements between two clones per population and between two conditions.** (A) Average copy number correlation of (A) mitochondrial DNA and (B) 2-micron plasmid between two clones. Pearson correlation for each clone pair is shown at the top left of each panel. The ancestor is represented by a red circle. Box plot reflects the mean copy number estimation of (C) mitochondrial DNA and (D) 2-micron plasmid of galactose and glucose-evolved populations. The gray dotted line indicates the initial copy number estimation from the ancestor. (C) Galactose-evolved populations have significant losses of mitochondrial DNA compared to glucose-evolved populations ( $p < 0.0001$ , Wilcoxon rank-sum test). (D) No significant difference in losses of 2-micron between both sugars ( $p = 0.43$ , Wilcoxon rank-sum test).
