# Supplementary material
Source: PubMed Central journal article supplement (PMC9734637)
Supplement: 239_2022_10079_MOESM9_ESM.pdf [file 239_2022_10079_MOESM9_ESM.pdf]

A

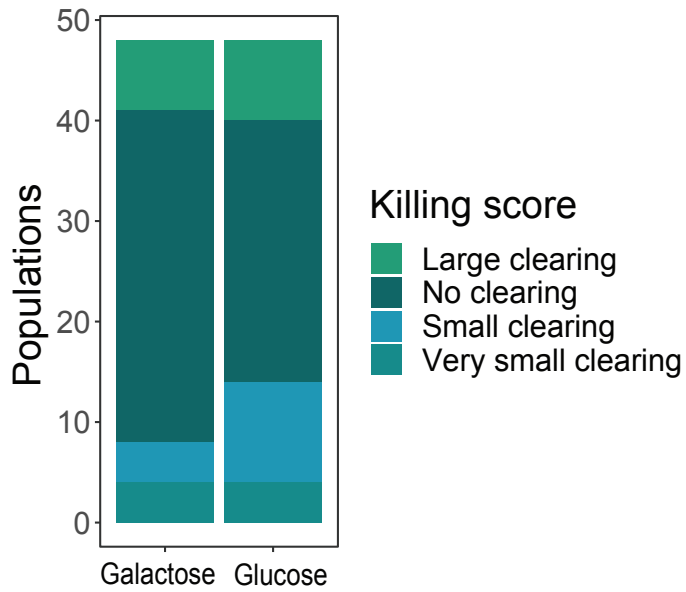

B

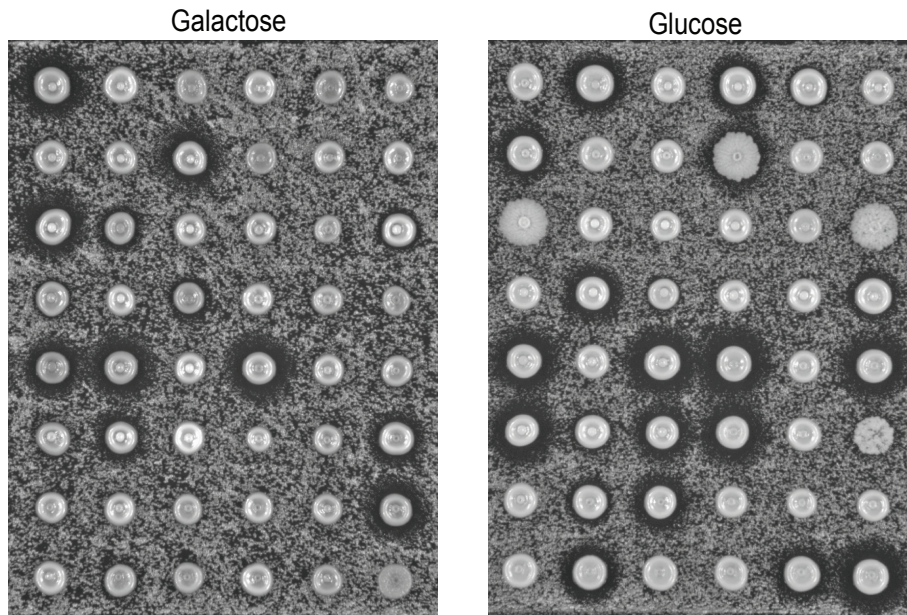

**Supplementary Figure 8. Killer-associated phenotype in galactose and glucose-evolved population.**

(A) Bar plot of killing score of 48 galactose and 48 glucose-evolved populations. (B) Halo assay of both evolved population (WT=large clearing, weak=small clearing, and none=no clearing).
